# Supplementary material for: Analysis of long‐term survival in multiple myeloma after first‐line autologous stem cell transplantation: impact of clinical risk factors and sustained response
Source: PubMed Central journal article supplement (PMC5806105; doi:10.1002/cam4.1283), 2017-12-28
Supplement: CAM4-7-307-s001.pdf [file CAM4-7-307-s001.pdf]

**a****Progression-free Survival by Response after ASCT**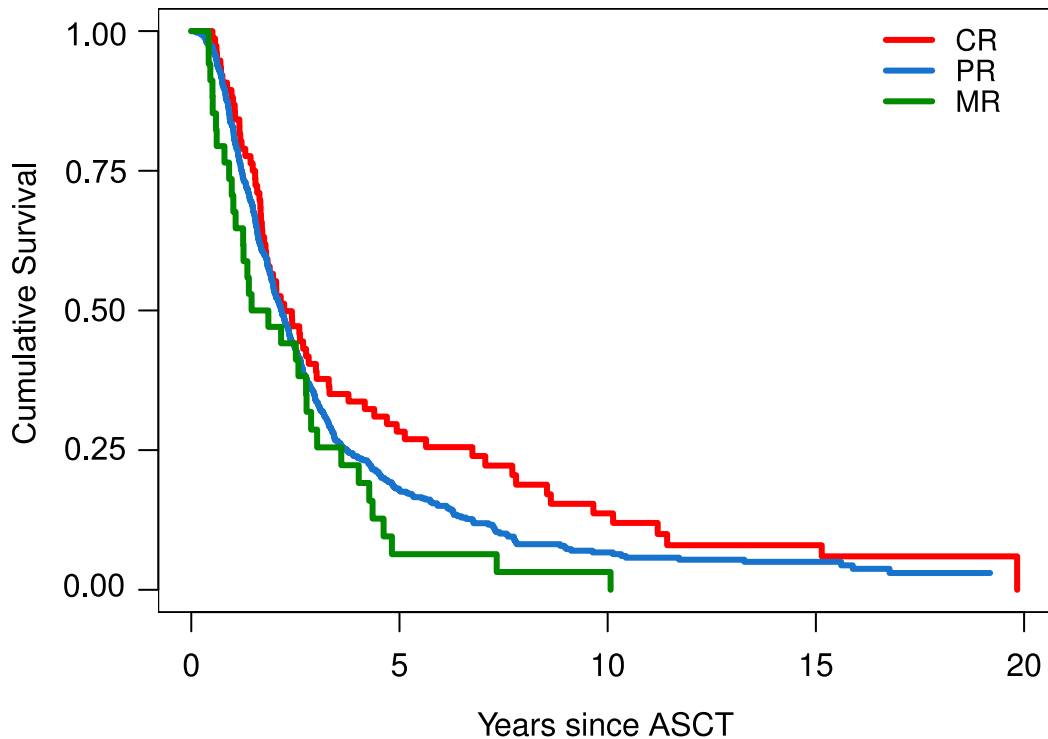

|    |     |     |     |    |    |    |    |    |   |   |   |
|----|-----|-----|-----|----|----|----|----|----|---|---|---|
| CR | 76  | 42  | 25  | 17 | 11 | 8  | 4  | 4  | 2 | 1 | 1 |
| PR | 652 | 331 | 129 | 66 | 29 | 22 | 15 | 12 | 7 | 4 | 0 |
| MR | 34  | 16  | 7   | 2  | 1  | 1  | 0  | 0  | 0 | 0 | 0 |

**b****Overall Survival by Response after ASCT**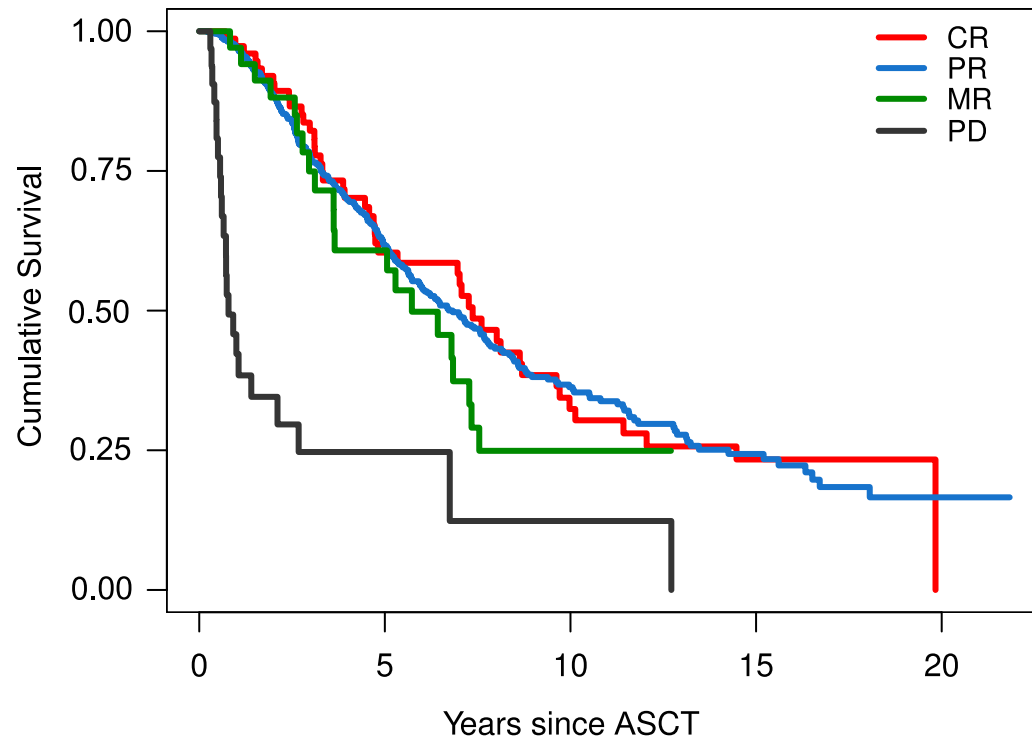

|    |     |     |     |     |     |    |    |    |    |   |   |
|----|-----|-----|-----|-----|-----|----|----|----|----|---|---|
| CR | 76  | 65  | 45  | 30  | 19  | 13 | 11 | 7  | 4  | 1 | 0 |
| PR | 652 | 511 | 315 | 175 | 101 | 62 | 42 | 25 | 10 | 3 | 1 |
| MR | 34  | 29  | 17  | 11  | 6   | 1  | 0  | 0  | 0  | 0 | 0 |
| PD | 36  | 6   | 3   | 2   | 1   | 1  | 0  | 0  | 0  | 0 | 0 |
