# Supplementary material for: Analysis of long‐term survival in multiple myeloma after first‐line autologous stem cell transplantation: impact of clinical risk factors and sustained response
Source: PubMed Central journal article supplement (PMC5806105; doi:10.1002/cam4.1283), 2017-12-28

**a****Progression-free survival**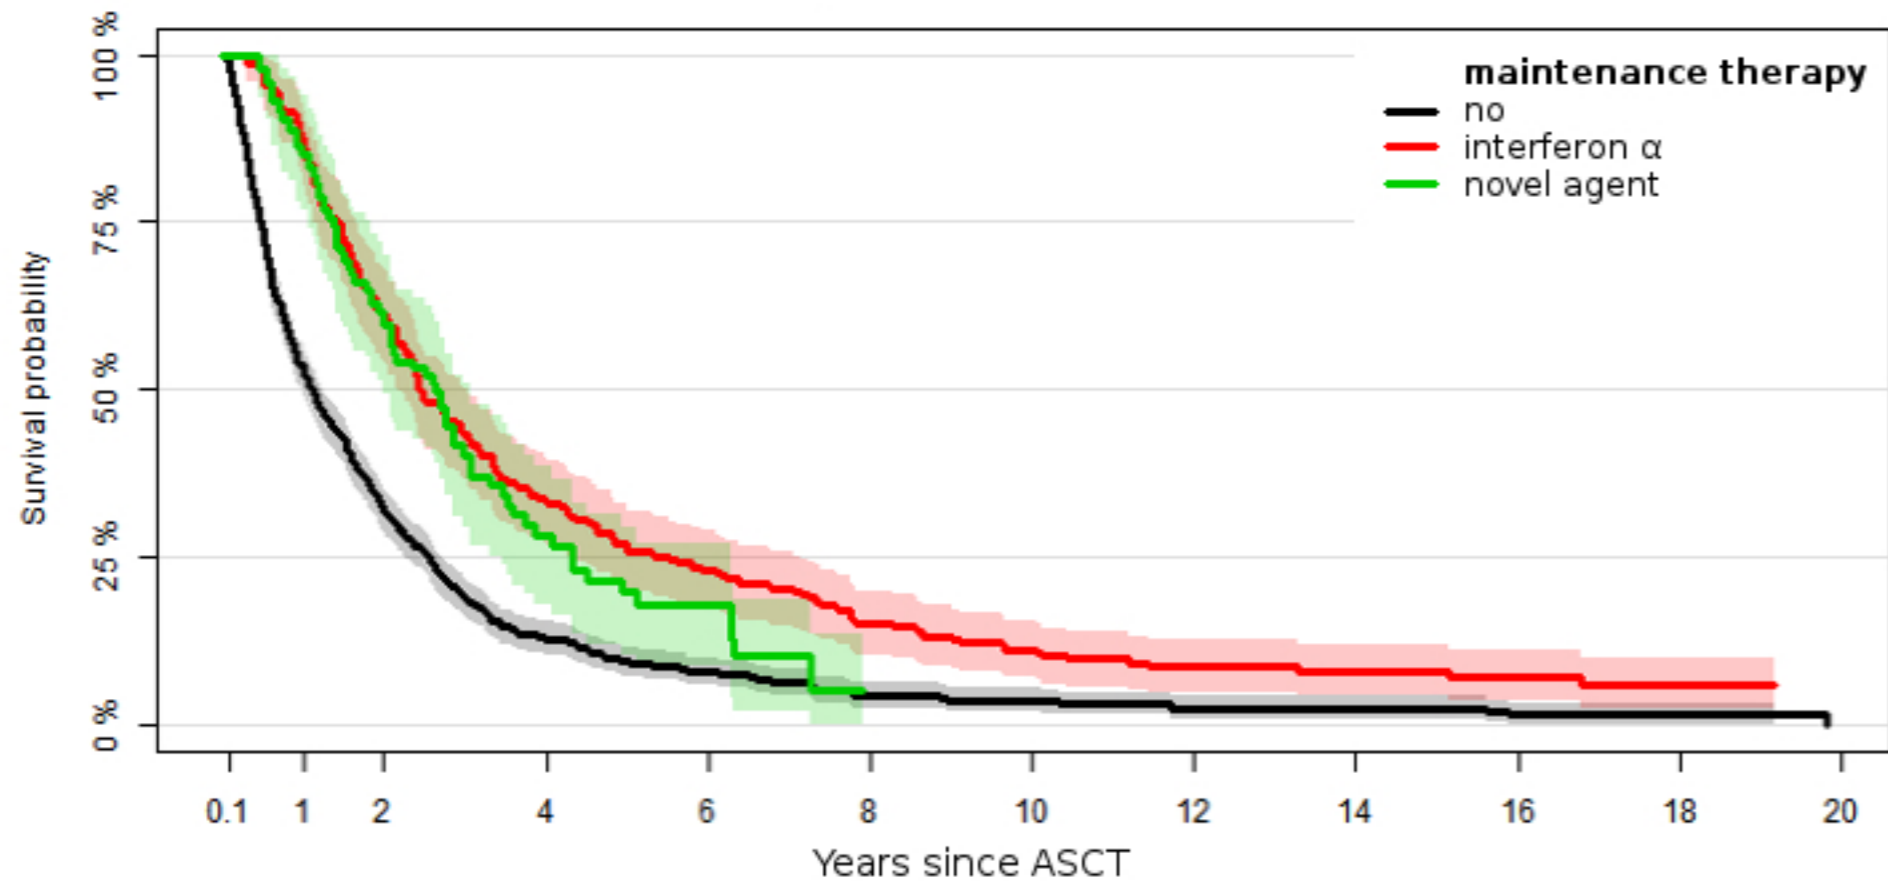**b****Overall survival**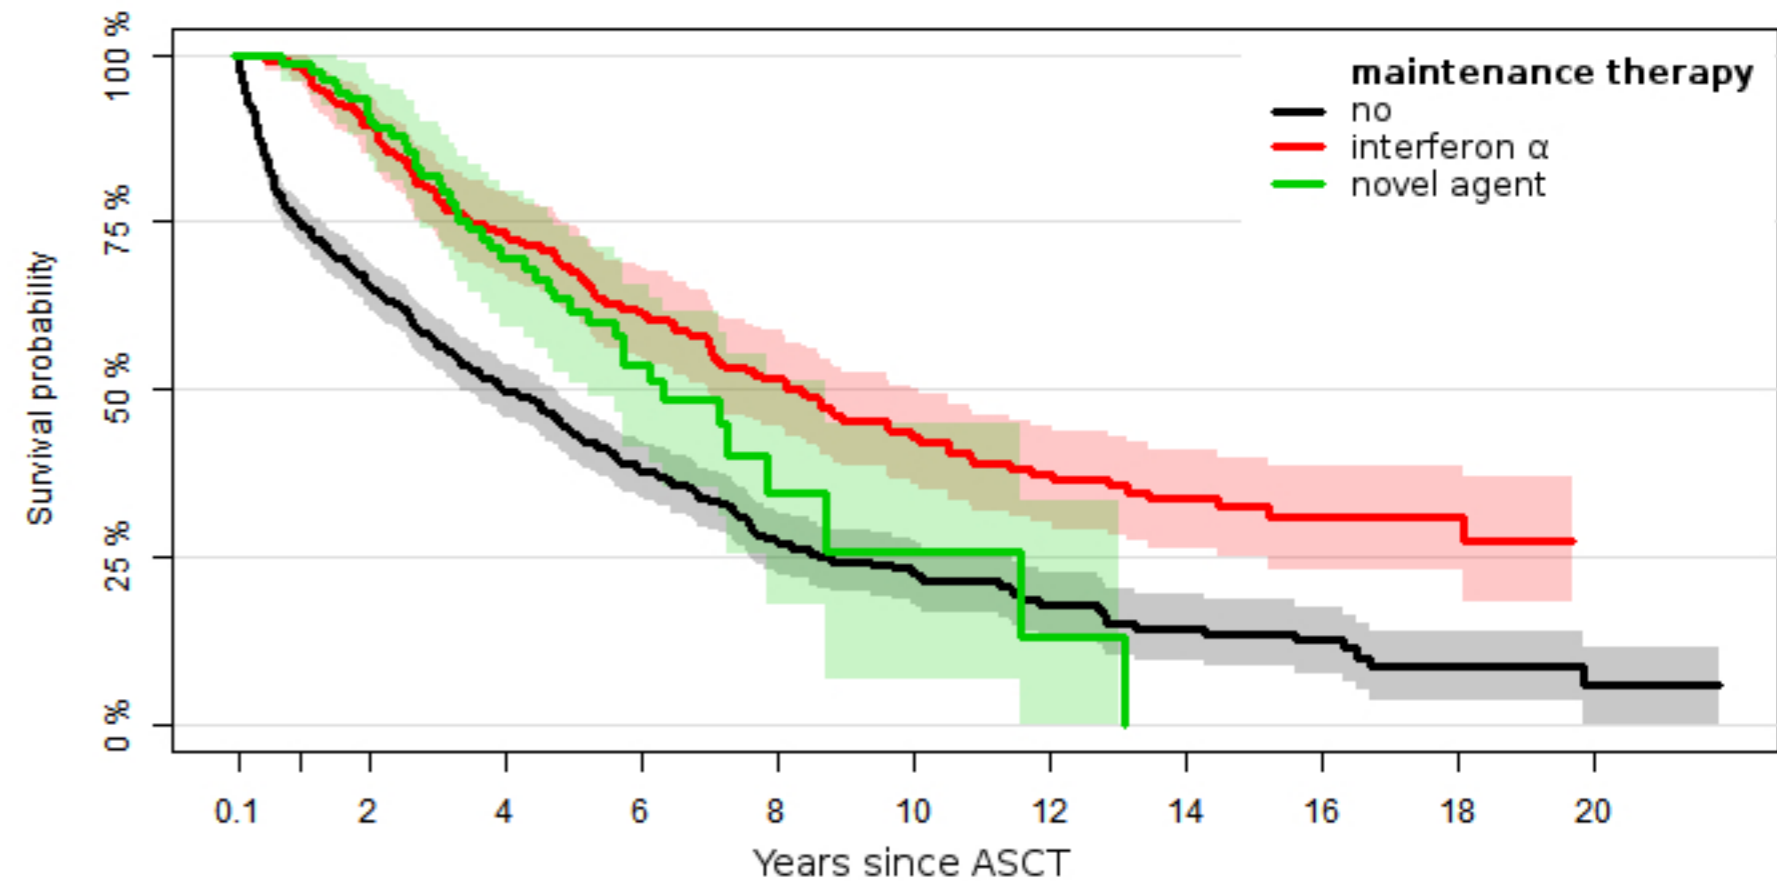

Supplement: CAM4-7-307-s002.pdf [file CAM4-7-307-s002.pdf]
