# Supplementary material for: Analysis of long‐term survival in multiple myeloma after first‐line autologous stem cell transplantation: impact of clinical risk factors and sustained response
Source: PubMed Central journal article supplement (PMC5806105; doi:10.1002/cam4.1283), 2017-12-28
Supplement: CAM4-7-307-s003.pdf [file CAM4-7-307-s003.pdf]

### 1-Year Landmark Analysis

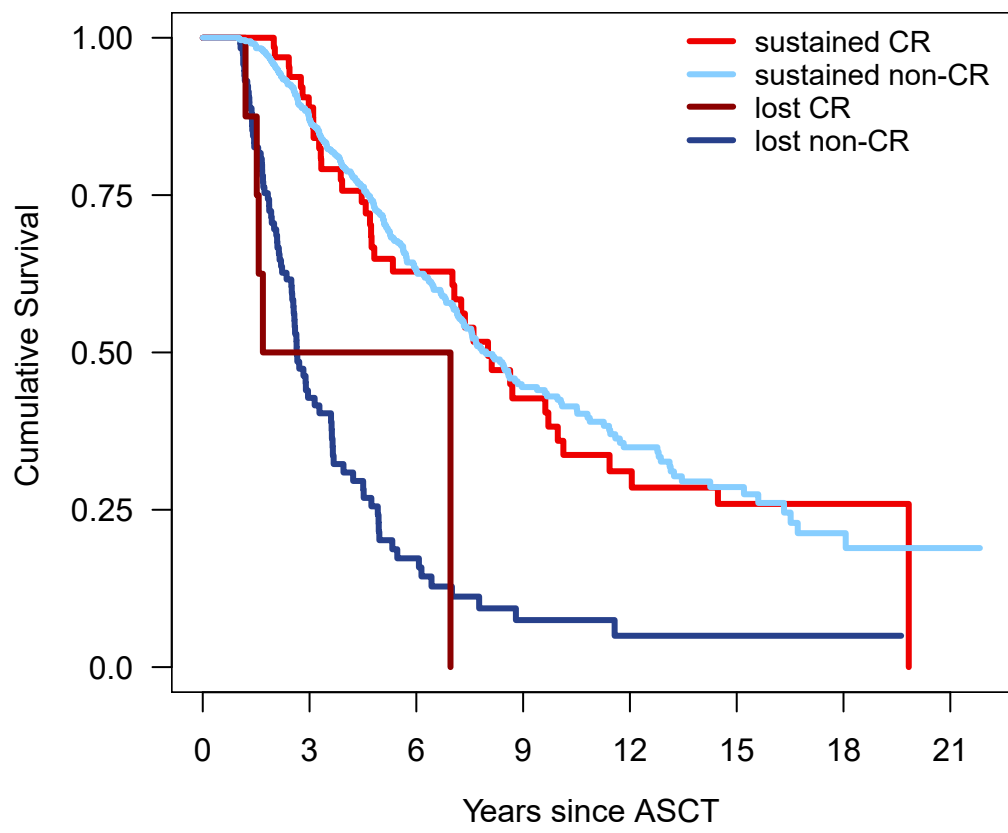

|                  |     |     |     |    |    |    |   |   |
|------------------|-----|-----|-----|----|----|----|---|---|
| sustained CR     | 65  | 55  | 30  | 19 | 12 | 8  | 2 | 0 |
| sustained non-CR | 544 | 390 | 210 | 97 | 50 | 26 | 9 | 1 |
| lost CR          | 8   | 1   | 1   | 0  | 0  | 0  | 0 | 0 |
| lost non-CR      | 118 | 36  | 12  | 4  | 1  | 1  | 1 | 0 |
